# Subcortical correlates of consciousness with human single neuron recordings

Michael Pereira<sup>1,2,3\*</sup>, Nathan Faivre<sup>1,4\*</sup>, Fosco Bernasconi<sup>1\*</sup>, Nicholas Brandmeir<sup>5</sup>, Jacob Suffridge<sup>2,6</sup>, Kaylee Tran<sup>2</sup>, Shuo Wang<sup>2,6,7</sup>, Victor Finomore<sup>2</sup>, Peter Konrad<sup>5</sup>, Ali Rezaei<sup>2,5\*</sup>, Olaf Blanke<sup>1,8\*</sup>

## 5 Affiliations

1 Laboratory of Cognitive Neuroscience, Neuro-X Institute & Brain Mind Institute, Faculty of Life Sciences, Swiss Federal Institute of Technology (EPFL), Geneva 1202, Switzerland

2 Department of Neurosciences, WVU Rockefeller Neuroscience Institute, Morgantown, West Virginia

10 3 University Grenoble Alpes, Inserm U1216, CHU Grenoble Alpes, Grenoble Institut Neurosciences, 38000 Grenoble, France

4 University Grenoble Alpes, University Savoie Mont Blanc, CNRS, LPNC, 38000 Grenoble, France

5 Departments of Neurosurgery, WVU Rockefeller Neuroscience Institute, Morgantown, West Virginia

6 Department of Computer Science and Electrical Engineering, West Virginia University, Morgantown, WV, 26506, USA

15 7 Department of Radiology, Washington University in St. Louis, St. Louis, MO, 63110, USA

8 Department of Clinical Neurosciences, University Hospital Geneva, Geneva, Switzerland

\* equal contribution

## Correspondence:

20 Michael Pereira  
michael.pereira@univ-grenoble-alpes.fr  
Grenoble Institut Neurosciences  
INSERM U1216  
Bâtiment Edmond J. Safra  
25 31 Chem. Fortuné Ferrini  
38700 La Tronche  
France

**Keywords:** Neural correlates of consciousness, detection, deep brain stimulation, single neuron  
30 activity

**Author Contributions:** MP, NF, FB, AR and OB developed the study concept and contributed to the study design. Neurosurgical procedures were carried out by NB, PK, and AR. Data collection was performed by MP, NF, FB, JS, and KT. Data analysis was carried out by MP, NF, FB. SW provided methodological support and VF supervised data collection. OB supervised the project. MP and NF  
35 drafted the paper; all authors provided critical revisions and approved the final version of the paper for submission.

**Declaration of interest:** The authors declare no competing interests.

## Abstract

40 Subcortical brain structures such as the basal ganglia or the thalamus are involved in  
regulating motor and cognitive behavior. However, their contribution to perceptual  
consciousness is still unclear, due to the inherent difficulties of recording subcortical  
neuronal activity in humans. Here, we asked neurological patients undergoing surgery for  
45 deep brain stimulation to detect weak vibrotactile stimuli applied on their hand while  
recording single neuron activity from the tip of a microelectrode. We isolated putative single  
neurons in the subthalamic nucleus and thalamus. A significant proportion of neurons  
modulated their activity while participants were expecting a stimulus. We isolated a subset of  
neurons for which we had sufficiently good behavior to contrast neuronal activity between  
detected and undetected stimuli. We found that the firing rate of 23% of these neurons  
50 differed between detected and undetected stimuli. Our results provide direct  
neurophysiological evidence of the involvement of subcortical structures in for the detection  
of vibrotactile stimuli, thereby calling for a less cortico-centric view of the neural correlates of  
consciousness.

## Introduction

55 Current methods to investigate the *neural correlates of consciousness* aim at contrasting the neural activity associated with different percepts under constant sensory stimulation to identify the minimal set of neuronal events sufficient for a specific conscious percept to occur (Koch et al., 2016; Seth et al., 2022). Typically, this involves asking participants to report whether a stimulus with an intensity around detection threshold is present or not. Taking  
60 advantage of the wealth of invasive electrophysiology recordings available, researchers have documented such correlates with detection tasks in rodents (e.g., Schmack et al., 2021), birds (Nieder et al., 2020) and non-human primates (e.g., Leopold & Logothetis 1996; de Lafuente & Romo, 2005). However, the use of animal models to study consciousness raises specific ethical concerns (e.g., Mazor et al., 2023), and requires interpreting  
65 behavioral responses with caution (Birch et al., 2022). Research into the neural correlates of consciousness in human volunteers is enriched by the analysis of fine-grained subjective reports to rule out various confounds (e.g attention, memory, report), but suffers from less spatially and temporally resolved physiological measurements. Indeed, only very few studies have found such correlates at the single neuron level (Fried et al., 1997; Quiroga et al.,  
70 2008; Reber et al., 2017; Gelbard-Sagiv et al., 2018; Pereira et al., 2021) and only in cortical regions. The role of subcortical structures for perceptual consciousness is theoretically relevant (Seth et al., 2022; Dehaene & Changeux, 2011; Ward, 2013; Schiff et al., 2008; Aru et al., 2020) with some empirical support from detection studies in non-human primates (Vazquez et al., 2012, 2013; Hagens et al., 2014; Tauste Campo et al., 2019), as well as  
75 functional imaging or local field potentials in humans (Levinson et al., 2021; Kronemer et al., 2022). Nonetheless, it remains unknown how the firing rate of subcortical neurons changes when a stimulus is consciously perceived. Here, we recorded individual neurons from the subthalamic nucleus (STN) and thalamus of human participants during 36 deep brain stimulation surgeries. Participants detected vibrotactile stimuli provided at the perceptual  
80 threshold and we tested how neurons in both subcortical structures were modulated by the task, the onset of the stimulus or the detection or not of the stimulus.

## Results

### Task and behavior

85 Deep brain stimulation surgeries provide a unique opportunity to record the activity of single  
neurons in subcortical structures of the human brain. Microelectrode recordings are  
performed routinely after patients are awakened from anesthesia, to allow  
electrophysiologists and neurosurgeons to identify the target brain structure along the  
planned trajectory (Figures 1B, S1). During this procedure, we attached a vibrotactile  
90 stimulator to the palm of the hand contralateral to the microelectrode recordings and  
estimated the stimulus intensity corresponding to participants' individual tactile detection  
threshold. Once stable neuronal activity could be recorded in the target brain region (STN or  
thalamus), we proceeded to the main experiment, which comprised one or two sessions of  
71 trials (total: 48 sessions). Each trial started with an audio "go" cue, followed by a  
95 vibrotactile stimulus applied at any time between 0.5 s and 2.5 s after the end of the cue (i.e.  
stimulation window), except for 20% of catch trials in which no stimulus was applied (Figure  
1A). After a random delay ranging from 0.5 to 1 s, a "respond" cue was played, prompting  
participants to verbally report whether they felt a vibration or not. Therefore, none of the  
reported analyses are confounded by motor responses. Using a staircase procedure, the  
100 stimulus intensity was kept around the detection threshold over the whole experiment. When  
possible, participants were trained to perform the task prior to the surgery.

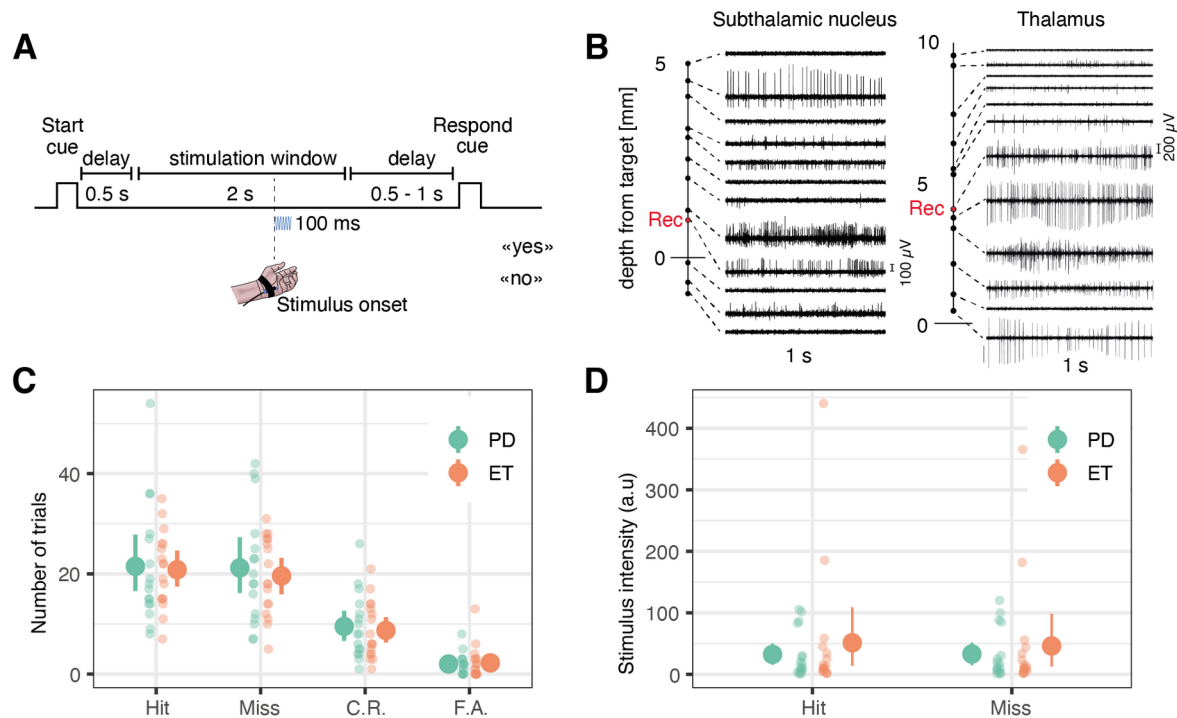

105 **Figure 1. Task and behavior.** **A.** Task timeline. Each trial started with an auditory start cue, followed  
 110 by a 0.5 s delay. Next, the stimulus could occur anytime during a 2 s stimulation window. After a  
 variable 0.5 to 1 s delay, a response cue prompted patients to answer whether or not they detected  
 the stimulus. **B.** Two example sets of 1 s long microelectrode recordings along the surgical tract  
 showing specific firing for the subthalamic nucleus (left) and the motor thalamus (right). The depth at  
 115 which the research data was collected is represented as a red dot (see Supplementary Figure 1 for  
 anatomical correspondence). **C.** Number of hits, misses, correct rejections (C.R.), and false alarms  
 (F.A.) collected during the main experiment. **D.** Averages of the absolute vibrotactile intensity in hits  
 and misses in arbitrary units (values cannot be compared between participants). In panels C and D,  
 each small dot represents a participant with Parkinson's Disease (PD, in green) or essential tremor  
 (ET, in orange). Big dots represent averages; error bars represent 95% confidence intervals.

When analyzing tactile perception, we ensured that our results were not contaminated with spurious behavior (e.g. fluctuation of attention and arousal due to the surgical procedure). We excluded specific series of trials from analyses based on objective criteria and focused  
 120 on trials where hits and misses occurred in commensurate proportions (see methods). This procedure led us to keep 36 sessions out of 48 with a mean of 24.0 [95% confidence interval = 22.0, 25.9] hit trials and 22.7 [20.8, 24.5] miss trials. Permutation tests at the single-participant level indicated that detected and missed stimuli were of similar intensity except in 5 sessions for which the intensity of detected stimuli was higher on average. Likewise,  
 125 detected and missed stimuli had similar onsets, except in 1 session for whom stimuli with late onsets were predominantly missed, and in 2 sessions for whom stimuli with early onsets were predominantly missed. The hit rate was comparable between participants with Parkinson's disease (0.51 [0.49, 0.53]) and essential tremor (0.52 [0.51, 0.53], Wilcoxon

rank sum test:  $W = 114.5$ ,  $p = 0.45$ ). Catch trials were separated into 9.1 [8.1 10.1] correct  
130 rejections and 2.1 [1.7, 2.6] false alarms, with an equivalent false alarm rate between  
participants with Parkinson's disease (0.24 [0.19, 0.28]) and essential tremor (0.24 [0.18,  
0.30]), Wilcoxon rank sum test:  $W = 145$ ,  $p = 0.76$ ). Intraoperative behavior was similar to the  
behavior observed during the training session and similar to what we found recently in a  
cohort of healthy participants using the same task (Pereira et al., 2021).

### 135 **Neuronal firing was modulated by the task**

We performed a total of 48 (STN: 25, Thal: 23) successful microelectrode recording  
sessions during 36 surgeries for deep brain stimulation electrode implantation. We isolated  
50 putative single neurons (STN: 26, Thal: 24) according to spike sorting metrics (Figure  
S2A-G). We ensured that all neurons showed stable spike amplitudes during the recording  
140 (Figure S2H-J). We also ensured that for every analysis, a minimum of 20 trials per condition  
were kept after removing artifacts. First, we looked for cue-selective neurons that modulate  
their firing rate during the 500 ms delay following the end of the "go" cue, compared to a 500  
ms pre-cue baseline period. There were 8 / 44 (18 %) cue-selective neurons (Figure 2A; 6  
neurons were removed from the analysis due to an insufficient number of trials). We  
145 confirmed that these 8 cue-selective neurons could not have been obtained by chance by  
comparing this number to a null distribution obtained by permuting trial labels 1000 times  
(permutation test:  $p < 0.001$ ). The proportion of cue-selective neurons was not significantly  
different in the STN (21%) and thalamus (15%; difference:  $p = 0.31$ , permutation test) and 6  
out of 8 neurons showed a decrease in firing rate compared to the pre-cue baseline  
150 (Binomial test:  $p = 0.145$ ).

Next, we investigated how many neurons showed task-selective modulations by comparing  
firing rates during the 2 s stimulation window to the 500 ms pre-cue baseline, indicating a  
modulation of their firing rate when a stimulus is expected. There were 9 / 44 (20 %) task-  
selective neurons (permutation test:  $p < 0.001$ ) with a similar proportion in the STN (20 %)  
155 and thalamus (21 %; binomial test:  $p = 0.91$ ; Figure 2B-D). Interestingly, 8 out of 9 neurons  
decreased their firing rate relative to the pre-cue baseline (Binomial test:  $p = 0.020$ ). In both  
regions, a significant proportion (44 %; permutation test:  $p < 0.001$ ) of the task-selective  
neurons were also cue-selective, modulating their firing rate before any sensory stimulation  
necessary for a decision occurred. Therefore, these cue- and task-selective neurons are  
160 unlikely to be involved in decision-related action selection or cancellation (15,16) but should  
be involved in the detection task *per se*.

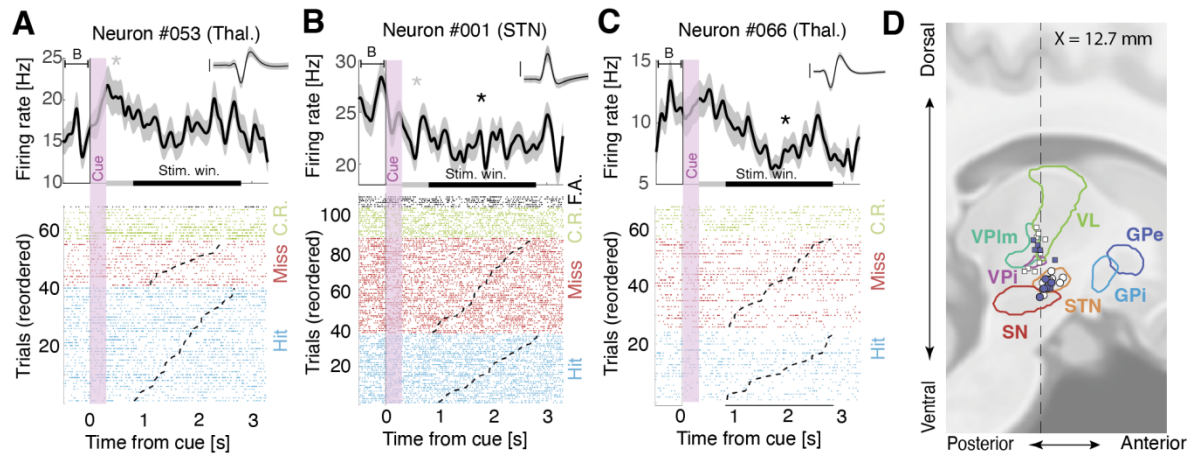

**Figure 2. Representative cue- and task-responsive neurons in distinct patients.** A-C. Upper panels: firing rates time-locked to the onset of a trial (300 ms long auditory cue; vertical purple shade), compared to a 500 ms pre-cue baseline ("B"). Two significance windows were tested: the post-cue window (500 ms after cue offset; grey horizontal bar; cue-selective neurons) or the stimulation window (800 ms to 2800 ms post-cue; black horizontal bar; task-selective neurons). Asterisks represent statistical significance ( $p < 0.05$ ). Shaded areas indicate bootstrapped standard errors. Inset: corresponding action potentials (shaded area indicates standard deviation; vertical bar corresponds to 100  $\mu$ V). Lower panels: raster plot with trials sorted by stimulus onset (dashed lines) and type: hits (blue), misses (red), correct rejections (C.R.; green), and false alarms (F.A.; black). A. Cue-selective neuron in the thalamus. B. Cue- and task-selective neurons in the STN. C. Task-selective neuron in the thalamus. D. Sagittal view of recording locations for thalamic (squares) and subthalamic (circles) targets (see Figure S3A for a coronal view). Filled circles or squares are cue/task-selective neurons. Legend: VL: ventral lateral thalamus, VPlm: ventral posterior lateral and medial thalamus, VPi: ventral posterior inferior thalamus, STN: subthalamic nucleus, SN: substantia nigra, GPi/e: globus pallidus internalis / externalis,

## 180 Neuronal firing was modulated by the stimulus

We then searched for neurons that modulate their firing rate after the stimulus onset compared to a 300 ms pre-stimulus baseline while correcting for possible drifts in the firing rate during the trial (see methods). We found 8 / 37 such stimulus-selective neurons (22%, permutation test:  $p = 0.011$ ; Figure 3A-D; 13 neurons were removed due to an insufficient number of trials), with 29% in the STN and 11% in the thalamus (difference: binomial test:  $p = 0.11$ ). These differences occurred  $210 \text{ ms} \pm 30$  after the stimulus onset, lasted for an average of  $130 \text{ ms} \pm 30$ , and 7 out of 8 neurons showed a decrease in firing rate after the stimulus onset (Binomial test:  $p = 0.020$ ). These results show that subthalamic and thalamic neurons are modulated by stimulus onset, irrespective of whether it was reported or not, even though no immediate motor response was required.



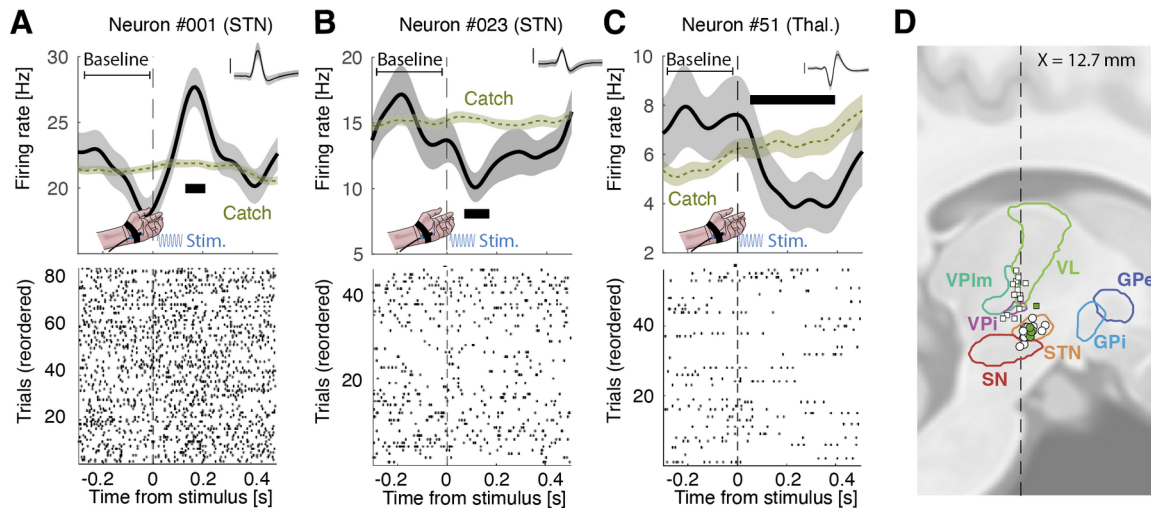

**Figure 3. Representative stimulus-responsive neurons in distinct patients.** A-C. Upper panels: firing rate time-locked to the onset of the stimulus (100 ms vibrotactile stimulation; blue sinusoid) for all trials. Green trace represents corresponding activity for catch trials. Thick horizontal black segments show significant time windows. Shaded areas indicate bootstrapped standard errors. Inset: corresponding action potentials (shaded area indicates standard deviation; vertical bar corresponds to 100  $\mu$ V). Lower panels: raster plot. The 300 ms pre-stimulus baseline was used only for statistics. D. Sagittal view of recording locations for thalamic (squares) and subthalamic (circles) targets (see Figure S3B for a coronal view). Filled circles or squares are sensory-selective neurons. Legend: VL: ventral lateral thalamus, VPlm: ventral posterior lateral and medial thalamus, VPi: ventral posterior inferior thalamus, STN: subthalamic nucleus, SN: substantia nigra, GPi/e: globus pallidus internalis / externalis,

### 205 Neuronal firing was modulated by tactile perception

Having identified subcortical neurons that were cue-, task- or stimulus-selective, we next sought to assess the role of these structures in conscious detection by comparing firing rates time-locked to detected vs missed stimuli. Of the 50 neurons recorded, 35 were associated with periods of high-quality behavior, allowing us to assume tactile stimulation at the perceptual threshold. We found 8 neurons (23 %) showing a significant difference after stimulus onset (permutation test:  $p = 0.0020$ ; Figure 4A-D). Each neuron was found in a different participant. The proportion of these perception-selective neurons was similar in the STN (27 %) and the thalamus (20 %; difference:  $p = 0.529$ ; permutation test). These differences in firing rates occurred  $160 \text{ ms} \pm 30$  after the stimulus onset and lasted for an average of  $90 \text{ ms} \pm 10$ . We note that, 6 out of 8 neurons had higher firing rates for missed trials than hit trials, although this proportion was not significant (binomial test:  $p = 0.145$ ). None of the aforementioned neurons showed sustained differences between the highest and lowest stimulus amplitudes nor between early and late stimulus onset within the 2 s stimulus window (Figure 5). Our control analyses confirm that our results do not stem from slight differences in stimulus amplitudes due to the staircase procedure or spurious differences induced by the start or response cues. Qualitatively, we found very little overlap between



task-, stimulus- and perception-selective neurons (Figure S4). This result suggests that neurons in these two subcortical structures have mostly different functional roles. We also found no clear indication that neurons with a beta-band oscillatory component were more or less selective.

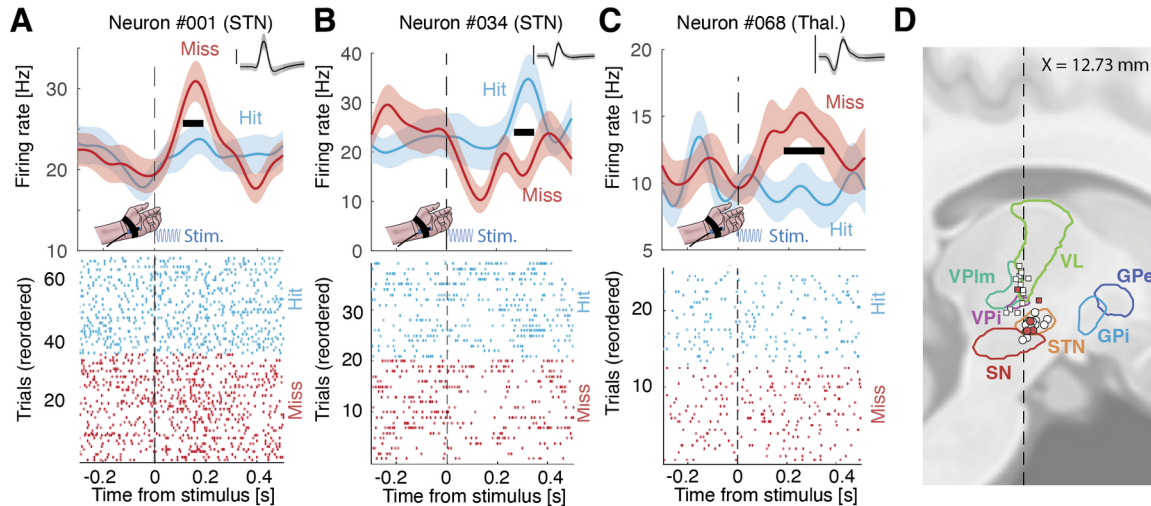

**Figure 4. Representative perception-selective neurons in distinct patients.** A-C Upper panels: firing rate time-locked to the onset of the stimulus (100 ms vibrotactile stimulation; blue sinusoid) for hits (light blue) and misses (red). Thick horizontal black segments show significant time windows. Shaded areas indicate bootstrapped standard errors. Inset: corresponding action potentials (shaded area indicates standard deviation; vertical bar corresponds to 100  $\mu$ V). Lower panels: raster plot for hits (light blue) and misses (red). D. Sagittal view of recording locations for thalamic (squares) and subthalamic (circles) targets (see Figure S3C for a coronal view). Filled circles or squares are perception-selective neurons. Legend: VL: ventral lateral thalamus, VPlm: ventral posterior lateral and medial thalamus, VPI: ventral posterior inferior thalamus, STN: subthalamic nucleus, SN: substantia nigra, GPi/e: globus pallidus internalis / externalis,

## Discussion

The importance of cortico-subcortical loops for physiological and cognitive functions is well-established (Shepherd & Yamawaki, 2021). Yet, while the role of subcortical structures in perceptual consciousness is largely acknowledged (Dehaene & Changeux, 2011; Koch et al., 2016; Ward, 2013; Aru et al., 2020; Shepherd & Yamawaki, 2021), it remains poorly described in humans. This limit is likely due to the difficulty of recording subcortical activity in awake humans capable of providing conscious reports under controlled experimental conditions. We report the first intraoperative recordings of subcortical neurons in awake individuals during a detection task. By imposing a delay between the end of the tactile stimulation window and the subjective report, we ensured that neuronal responses reflected stimulus detection and not mere motor responses. In addition, because stimuli were applied on the palm, we asked participants to provide detection responses orally to avoid

confounding neural activity related to sensory and motor processes of the upper limb. Our  
 250 main result is that the activity of subcortical neurons co-varies with subjective reports  
 following the presentation of detected vs missed tactile stimuli. This result confirms that the  
 neuronal underpinnings of tactile detection can be observed at the scale of single neurons in  
 humans (Fried et al., 1997; Quiroga et al., 2008; Reber et al., 2017; Gelbard-Sagiv et al.,  
 2018; Pereira et al., 2021) but also shows for the first time that they are not limited to the  
 255 cortex.

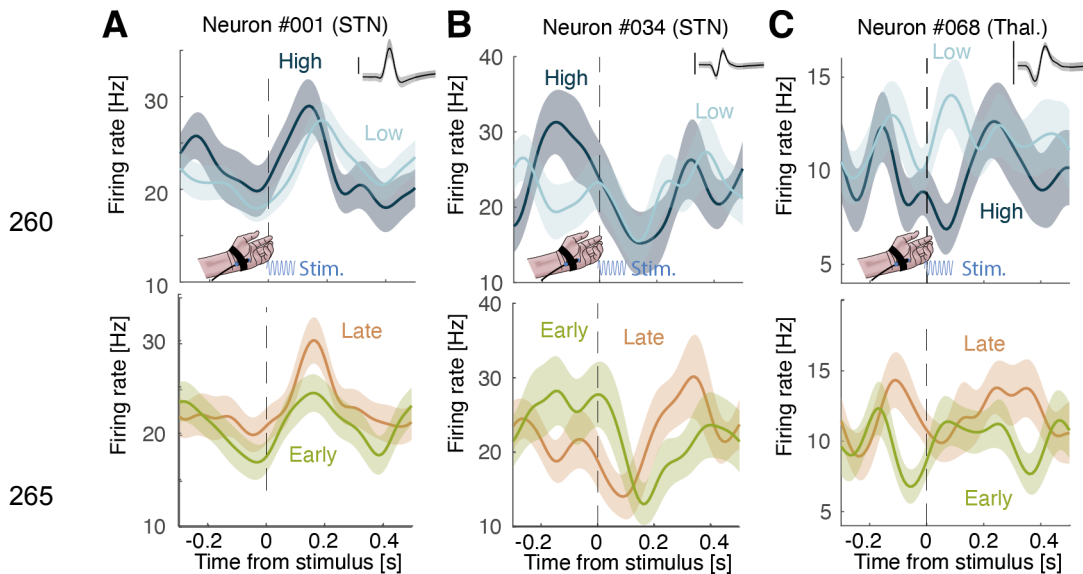

**Figure 5. Neurons from Figure 4, for different stimulus intensities and onsets.** We used the  
 270 same trials as in Figure 4 but segregated in high versus low stimulus intensities (upper panel)  
 and long stimulus onsets (lower panel). We found only 5 / 32 neurons sensitive to stimulus intensity  
 (16%;  $p = 0.13$ ; permutation test) and no neurons sensitive to stimulus onset (0 / 35). None of the 5  
 intensity-selective neuron corresponded to a perception-sensitive neuron. **A-C.** Firing rate time-locked  
 275 to the onset of the stimulus (100 ms vibrotactile stimulation; blue sinusoid) for high intensity (light  
 blue) and low intensity (dark blue) trials (upper panel) or early (green) and late (orange) stimulus  
 onsets. Shaded areas indicate bootstrapped standard errors. Inset: corresponding action potentials  
 (shaded area indicates standard deviation; vertical bar corresponds to 100  $\mu$ V).

Our findings that neurons in the thalamus modulate their activity according to tactile  
 detection adds to the existing evidence in favor of the role of the thalamus for perceptual  
 280 consciousness. Indeed, thalamic activity and more precisely thalamocortical loops are often  
 considered key to gate sensory stimuli to conscious access (Ward, 2013). In non-human  
 primates, for example, oscillatory thalamic activity predicts tactile detection (Haegens et al.,  
 2014), and functional interactions between the somatosensory thalamus and the cortex  
 increase when a tactile stimulus is detected (Tauste Campo et al., 2019). In humans,  
 285 thalamic local field potentials and fMRI activity were higher for seen vs unseen stimuli

(Kronemer et al., 2022; Levinson et al., 2021) and causal effects of thalamic stimulation on the levels of consciousness have been found (Schiff et al., 2007). Future studies with higher neuronal yields will be helpful in assessing the contribution of distinct thalamic territories to tactile consciousness, focusing notably on the ventral caudal part, which contains neurons  
290 with tactile receptive fields.

Concerning the subthalamic nucleus, a possibility is that perception-selective neurons determine stimulus detection through the regulation of decisional processes. Indeed, previous studies reported a modulatory role of subthalamic activity on decisional processes, notably by elevating the decisional threshold on accumulated sensory evidence (Bogacz et al., 2007; Cavanagh et al., 2011; Green et al., 2013; Herz et al., 2016). In a recent study in  
295 which we measured the activity of cortical neurons in a similar task, we showed that evidence accumulation is also at play during conscious detection (Pereira et al., 2021). Based on this finding, we proposed that percepts fade in and out of consciousness when evidence accumulated by cortical neurons passes a given threshold (Pereira et al., 2022).  
300 The present results, therefore, indicate that the contribution of subthalamic neurons to decisional processes is not limited to discrimination tasks or motor planning, but may also regulate the threshold at which accumulated evidence gives rise to a conscious percept. Considering the inhibitory role of the subthalamic nucleus on the cortex (Mink et al., 1996), the fact that many of the perception-selective neurons we found had higher firing rate for  
305 misses than for hits suggests a role in elevating that threshold, similar to what is found in decision tasks manipulating conflict or cautiousness and requiring immediate responses (Franck et al., 2007; Cavanagh et al., 2011; Benis et al., 2016; Herz et al., 2016; Mosher et al., 2021). Thus, our results suggest that the STN plays an important role in a subcortical network gating conscious access, although it might not encode conscious content *per se*  
310 (Aru et al., 2012).

Apart from perception-selective neurons, we also found a distinct population of neurons in both the STN and thalamus that modulated their firing rate both after the cue and during the task, and therefore much before the stimulus onset. These neurons cannot be involved in detection-related processes but could instead be involved in task switching (Hikosaka &  
315 Isoda, 2010). We also found neurons that modulated their firing rates after the stimulus onset, irrespective of detection, similar to animal works in the STN (Al Tanir et al., 2023) and thalamus (Vazquez et al., 2012; Tauste Campo et al., 2018). Our results should be taken with caution as they are based on a small number of neurons due to the high complexity of intraoperative recordings, and because the number of trials we could collect was not  
320 sufficient to test the computational mechanisms underlying the neuronal activity we recorded. Future studies combining cortical and subcortical recordings would be useful to

consolidate these findings and investigate how subcortical regulation interacts with the cortex. For example, the 160 ms latency we observed post-stimulus corresponds to the onset of a putative cortical correlate of consciousness, the perceptual awareness negativity (Dembski et al., 2021). We confirmed that our detection task was compatible with a contrastive analysis of consciousness in that it elicited a similar number of yes (detected stimuli or hit trials) and no responses (missed stimuli or miss trials), irrespective of stimulus intensity or stimulus onset. Nevertheless, it will be important in future studies to examine if similar subcortical responses are obtained when when stimuli are unattended (Wyart & Tallon-Baudry, 2008), task-irrelevant (Shafto & Pitts, 2015), or when participants passively experience stimuli without the instruction to report them (i.e., no-report paradigms) (Tsuchiya et al., 2015).

In sum, our study provides neurophysiological evidence from single neurons in humans that subcortical structures play a significant role in tactile detection either by themselves (Ward, 2013) or through their numerous connections with the cortex (Dehaene & Changeux, 2011). A comprehensive account of the neural correlates of consciousness should, therefore, not be cortico-centric but also consider subcortical contributions.

## Methods

### Participants

340 We recorded high impedance electrophysiological signals from microelectrodes inserted  
intraoperatively in the subthalamic nucleus of 32 participants with Parkinson disease or essential  
tremor undergoing deep brain stimulation electrode implantation surgeries (N = 36; 4 participants had  
two surgeries, one for each side). For individuals with Parkinson's disease, the age at the time of the  
recording was  $60.4 \pm 2.7$  years and the average UPDRS III score was  $40.6 \pm 3.0$  prior to surgery and  
345 was reduced to  $20.8 \pm 2.8$  after the surgery ( $p = 0.0015$ ,  $z = 3.18$ ). We also recorded intraoperatively  
in the thalamus of individuals with essential tremor undergoing deep brain stimulation surgeries. The  
age at the time of the recording was  $68.9 \pm 3.2$  years and the average TETRA motor score was  $20.1 \pm$   
 $2.9$  prior to surgery. The study was approved by the institutional review board of the West Virginia  
University Hospital (WVU02HSC17; #1709745061) and all participants provided written informed  
350 consent prior to any data collection.

### Experimental procedure

Participants performed a tactile detection task programmed in Matlab using the Psychophysics  
toolbox (Brainard, 1997; Pelli, 1997; Kleiner et al., 2007). When possible, participants were trained a  
few days before the surgery (N = 18 / 36 surgeries). Participants sat in a reclining chair in a quiet  
355 room (training session) or were lying in the operating room (main session). Every trial started with a  
300 ms long auditory "go" cue delivered through an external loudspeaker placed near the participants.  
Following the end of the go cue and a delay of 500 ms, a 100 ms vibrotactile stimulus could be  
delivered at any time during a two second stimulation window (i.e., uniform distribution between 0.8  
and 2.8 s after the onset of the go cue; Figure 1A) on the lateral palm contralateral to the deep brain  
360 implant. Stimuli were applied using a MMC3 Haptuator vibrotactile device from TactileLabs Inc.  
(Montréal, Canada) driven by a 230 Hz sinusoid audio signal. Participants reported orally whether  
they felt the stimulus or not and whether they were confident in their answer or not after an auditory  
"respond" cue played one second after the end of the stimulation window. The participants responses  
could thus consist in "yes, sure", "yes, unsure", "no, sure" and "no, unsure". The task was stopped  
365 after two sessions of 71 trials, or before in case of discomfort or other clinical constraints. As –upon  
waking from anesthesia– most participants did not use both confidence levels, confidence data was  
therefore not analyzed.

To keep the vibrotactile stimulus intensity around the detection threshold, we first conducted a rough  
threshold search by presenting a series of stimuli whose intensity decreased by steps of 5% until  
370 participants reported not feeling them anymore. Then we presented series of low intensity stimuli  
whose intensities increased by step of 5% until participants reported feeling them again. These  
procedures were repeated until the experimenter deemed the results satisfying. We took the average  
between the thresholds obtained during these procedures as a seed for the main task. During the  
main task, a 1up/1down adaptive staircase procedure (Levitt, 1971) ensured that the intensity was  
375 kept around the perceptual threshold by increasing the intensity by 5% after miss trial and decreasing

the intensity by 5% after a hit trial. Of note, the absolute stimulus intensity is not informative and cannot be compared across patients and sessions, as it varied according to different factors (e.g. the length of the cable or the manner with which the tactile stimulator was strapped onto the palm).

### **Surgical procedure**

380 STN or thalamus targets and trajectories were defined preoperatively using CranialSuite (Neurotargeting Inc., Nashville, US) based on MRI scans. Both targets were then defined with respect to the AC-PC (commissural) line using standard atlas-based methods and refined based on individual anatomy. The entry point was chosen approximately 2 to 3 cm from the midline and 1 cm anterior from the coronal suture and adjusted to individual anatomy in order to avoid traversing brain sulci, 385 lateral ventricles or the medial bridging veins. Scalp incisions and burr-hole drilling were performed under local (lidocaine) and general (propofol) anesthesia and a microelectrode (FHC, Maine, US) was inserted through a guide cannula using a microdrive placed either on a Leksell frame (N = 13 surgeries) or a 3D printed mould (N = 23 surgeries).

### **Electrophysiology**

390 Once the microelectrode reached the target brain structure (STN or thalamus), the speed of the microdrive was reduced and neuronal activity was streamed to a loudspeaker, allowing the electrophysiologist to verify the depth of the preplanned trajectory. The main research task was initiated when a neuron showed stable activity for a few tens of seconds and the anatomical localization was confirmed by the electrophysiologist. Recording depths were saved and used offline 395 to define the anatomical localization (see Anatomical localization section). Electrophysiological data were recorded from the 5 mm tip of the microelectrode, referenced to the guide cannula and an adaptive line noise canceller was applied. Data were digitized either using a Guideline 4000 LP+ amplifier (FHC, Maine, US) at 30 kHz (N = 21 surgeries), or using a Guideline 5 amplifier (FHC, Maine, US) at 32 kHz and resampled offline to 30 kHz (N = 14 surgeries).

### **Anatomical localization**

400 For 34 / 50 neurons, preoperative MRI and postoperative CT scans (co-registered in patient native space using CranialSuite) were available to precisely reconstruct surgical trajectories and recording locations (for the remaining 16 neurons, localizations were based on neurosurgical planning and confirmed by electrophysiological recordings at various depths). Recording depths were inspected 405 along the trajectories in patient native space, projected to an MNI-coordinate space and compared against the Ilinsky atlas (Ilinsky et al., 2018) which delineates distinct thalamic sub-territories based on a marker of  $\gamma$ -aminobutyric acid on sections post-mortem human brains.

### **Behavioral analyses**

410 We used R 4.1.2 (Team R, 2020) and the tidyverse (Wickham et al., 2019) package to analyze behavioral data. Permutation tests were performed by permuting hit and miss trials over 1000 iterations for each participant. Non-parametric p-values were estimated by counting the permutations



for which the difference between hits and misses was higher in the observed compared to the shuffled data.

As titrating and keeping the vibrotactile stimulation intensity to the perceptual level after anesthesia was a challenging task, we took great care in keeping only the highest quality recordings. We  
415 estimated the trial-by-trial hit-rate using a sliding window of 11 trials (for the first and last 5 trials, we mirrored trials to avoid border effects). Any trial with a hit-rate out of the ]25, 75[ % range were removed from further analysis comparing hit to miss trials. If less than 10 hit and 10 miss trials were kept by this procedure, the session (and its corresponding neurons) was removed from subsequent  
420 analyses (13 / 48 sessions; 27 %).

### **Spike sorting and firing rate estimation**

Each microelectrode recording was filtered between 300 and 3000 Hz and visually inspected. Artifacts such as cross-talk from the participants' vocal responses were marked and replaced by noise with a standard deviation matching the second pre- and post-artifact. We performed this procedure to avoid  
425 spuriously lowering the thresholds for neuronal spike detection. The timing of these artifactual epochs were saved in order to reject affected trials in later analyses. Neuronal spikes were detected and clustered using an online semi-automatic spike sorting algorithm (OSort) (Rutishauser et al., 2006). Each resulting cluster of neurons was inspected based on common metrics such as spike waveform, percentage of inter-spike interval below 3 ms, signal-to-noise ratio and power spectral densities and  
430 possibly merged with other clusters. Finally, the resulting curated neurons were labeled as *putative single neuron* or *multiunit*, depending on the spike waveforms, peak amplitude distribution and the percentage of inter-spike interval below 3 ms. Electrophysiological signals were realigned either to the onset of the "go" cue (Figures 2) or to the onset of the stimulus (Figures 3-4), which was precisely obtained by applying a matched filter to a copy of the audio signal used to drive the vibrotactile  
435 stimulator we simultaneously recorded with the electrophysiological data. We estimated instantaneous firing rates using a sliding Gaussian kernel with a standard deviation of 40 ms and 1 ms steps. When displaying the resulting average firing rates over time, we estimated the standard error of the mean using a bootstrap procedure with 1000 resamplings.

### **Identification of selective neurons**

To thoroughly control for false positives and possibly non-normal distributions, we exclusively used non-parametric statistics (Wilcoxon rank sum test, sign test), coupled with permutation tests. For each analysis, we verified that the reported number of neurons could not have been obtained by chance by comparing this number to a null distribution using permutation tests (Maris & Oostenveld, 2007). For paired tests with respect to a baseline, we randomly flipped the sign of the difference between the  
445 firing rate during the trial and during the baseline and for unpaired tests, we randomly shuffled the conditions (i.e. a hit trial could be randomly assigned to a hit or a miss trial). To obtain a p-value, we compared the number of selective neurons to a null distribution obtained by randomly permuting the data 1000 times. This procedure allowed us to show that the number of selective neurons could not have been obtained by chance while controlling for multiple comparisons over time. Similarly, to test  
450 whether the proportion of neurons was different in the STN compared to the thalamus, we compared

the absolute difference in the proportion of neurons in each anatomical location to a null distribution obtained by random permutations.

To identify cue-selective neurons we compared the number of spikes in a 500 ms baseline preceding the “go” cue to the number of spikes in a 500 ms period following the offset of the “go cue” using a  
455 two-tailed non-parametric sign test. Similarly, we identified task-responsive neurons by comparing the mean number of spikes in a 500 ms baseline preceding the “go” cue to the mean number of spikes during the 2 s stimulation window and performing a permutation test. We compared the differences in the proportion of selective neurons in the STN and thalamus, to the same differences observed in the shuffled data to assess its significance. Finally, we also compared the number of cue- and task-  
460 selective neurons to the same number observed in the shuffled data to assess whether the overlap was significant.

To identify detection-selective neurons, we looked for differences in the firing rates during the first 400 ms post-stimulus onset, assuming that subcortical signatures of stimulus detection ought to be found early following its onset. To correct for possible drifts occurring during the trial, we subtracted the cue-  
465 locked activity from catch trials to the cue-locked activity of stimulus-present trials before realigning to stimulus onset. We defined a cluster as a set of adjacent time points for which the firing rates were significantly different between hits and misses, as assessed by a non-parametric Wilcoxon rank sum test. A putative neuron was considered perception-selective when the length of a cluster was above 80 ms, corresponding to twice the standard deviation of the smoothing kernel used to compute the  
470 firing rate. Whether for the shuffled data or the observed data, if more than one cluster was obtained, we discarded all but the longest cluster. This permutation test allowed us to control for multiple comparisons across time and participants.

### **Data and code availability**

Data and code necessary to replicate our results are available online  
475 (<https://gitlab.com/michael.pereira/subcortical-ncc>).

Further information and requests should be directed to and will be fulfilled by the lead contact, Michael Pereira ([michael.pereira@univ-grenoble-alpes.fr](mailto:michael.pereira@univ-grenoble-alpes.fr)).

**Acknowledgments:** MP was supported by two Postdoc.Mobility fellowships from the Swiss National Science Foundation (P2ELP3\_187974; P400PM\_199251). NF has received funding from the  
480 European Research Council (ERC) under the European Union’s Horizon 2020 research and innovation program (grant agreement no. 803122). OB is supported by the Bertarelli Foundation, the Swiss National Science Foundation, and the European Science Foundation.

## References

- 485 Al Tannir, R., Pautrat, A., Baufreton, J., Overton, P. G., & Coizet, V. The Subthalamic Nucleus : A Hub for Sensory Control via Short Three-Lateral Loop Connections with the Brainstem? *Current Neuropsychopharmacology*, 2023, 21(1), 22-30.
- Aru J, Bachmann T, Singer W, Melloni L. Distilling the neural correlates of consciousness. *Neurosci Biobehav Rev*. 2012;36(2):737-46.
- 490 Aru, J., Suzuki, M., & Larkum, M. E. Cellular Mechanisms of Conscious Processing. *Trends in Cognitive Sciences*, 2020, 24(10), 814-825.
- Benis, D., David, O., Piallat, B., Kibleur, A., Goetz, L., Bhattacharjee, M., Fraix, V., Seigneuret, E., Krack, P., Chabardès, S., & Bastin, J. Response inhibition rapidly increases single-neuron responses in the subthalamic nucleus of patients with Parkinson's disease. *Cortex*, 2016, 84,
- 495 111-123.
- Birch, J., Broom, D. M., Browning, H., Crump, A., Ginsburg, S., Halina, M., Harrison, D., Jablonka, E., Lee, A. Y., Kammerer, F., Klein, C., Lamme, V., Michel, M., Wemelsfelder, F., & Zacks, O. . How Should We Study Animal Consciousness Scientifically? *Journal of Consciousness Studies*, 2022, 29(3), 8-28. <https://doi.org/10.53765/20512201.29.3.008>
- 500 Bogacz R, Usher M, Zhang J, McClelland JL. Extending a Biologically Inspired Model of Choice: Multi-Alternatives, Nonlinearity and Value-Based Multidimensional Choice. *Philos Trans Biol Sci*. 2007;362(1485.):1655-70.
- Brainard, D. H. The Psychophysics Toolbox, *Spatial Vision* 1997;10:433-436.
- Cavanagh JF, Wiecki TV, Cohen MX, Figueroa CM, Samanta J, Sherman SJ, et al. Subthalamic
- 505 nucleus stimulation reverses mediofrontal influence over decision threshold. *Nat Neurosci*. 2011;14(11):1462-7.
- Dehaene S, Changeux JP. Experimental and Theoretical Approaches to Conscious Processing. *Neuron*. 2011;70(2):200-27.
- de Lafuente, V., & Romo, R. Neuronal correlates of subjective sensory experience. *Nature*
- 510 *Neuroscience*. 2005, 8(12), 1698-1703.
- Dembski C, Koch C, Pitts M. Perceptual awareness negativity: a physiological correlate of sensory consciousness. *Trends Cogn Sci*. 2021;25(8):660-70.
- Frank MJ, Samanta J, Moustafa AA, Sherman SJ. Hold Your Horses: Impulsivity, Deep Brain Stimulation, and Medication in Parkinsonism. *Science*. 2007;318(5854):1309-12.
- 515 Fried I, MacDonald KA, Wilson CL. Single Neuron Activity in Human Hippocampus and Amygdala during Recognition of Faces and Objects. *Neuron*. 1997;18(5):753-65.
- Gelbard-Sagiv H, Mudrik L, Hill MR, Koch C, Fried I. Human single neuron activity precedes emergence of conscious perception. *Nat Commun*. 2018;9(1):2057.
- Green N, Bogacz R, Huebl J, Beyer AK, Kühn AA, Heekeren HR. Reduction of Influence of Task
- 520 Difficulty on Perceptual Decision Making by STN Deep Brain Stimulation. *Curr Biol*. 2013;23(17):1681-4.
- Haegens S, Vazquez Y, Zainos A, Alvarez M, Jensen O, Romo R. Thalamocortical rhythms during a

- vibrotactile detection task. *Proc Natl Acad Sci.* 2014;111(17):E1797-805.
- Herz DM, Zavala BA, Bogacz R, Brown P. Neural Correlates of Decision Thresholds in the Human  
525 Subthalamic Nucleus. *Curr Biol.* 2016;26(7):916-20.
- Hikosaka O, Isoda M. Switching from automatic to controlled behavior: cortico-basal ganglia  
mechanisms. *Trends Cogn Sci.* 2010;14(4):154-61.
- Ilinsky, I., Horn, A., Paul-Gilloteaux, P., Gressens, P., Verney, C., and Kultas-Ilinsky, K. Human Motor  
Thalamus Reconstructed in 3D from Continuous Sagittal Sections with Identified Subcortical  
530 Afferent Territories. *ENeuro* 2018; 5(3):1–17
- Kleiner M, Brainard D, Pelli D, 2007, "What's new in Psychtoolbox-3?" *Perception 36 ECVF Abstract  
Supplement.*
- Koch C, Massimini M, Boly M, Tononi G. Neural correlates of consciousness: progress and problems.  
*Nat Rev Neurosci.* 2016;17(5):307-21.
- 535 Kronemer SI, Aksen M, Ding JZ, Ryu JH, Xin Q, Ding Z, et al. Human visual consciousness involves  
large scale cortical and subcortical networks independent of task report and eye movement  
activity. *Nat Commun.* 2022;13(1):7342.
- Leopold, D. A., & Logothetis, N. K. Activity changes in early visual cortex reflect monkeys' percepts  
during binocular rivalry. *Nature*, 1996, 379(6565), 549-553.
- 540 Levinson M, Podvalny E, Baete SH, He BJ. Cortical and subcortical signatures of conscious object  
recognition. *Nat Commun.* 2021;12(1):2930.
- Levitt H. Transformed Up-Down Methods in Psychoacoustics. *J Acoust Soc Am.* 1971;49(2B):467-77.
- Maris, E., and Oostenveld, R. Nonparametric statistical testing of EEG- and MEG-data. *Journal of  
Neuroscience Methods.* 2007. 164, 177–190.
- 545 Mazor, M., Brown, S., Ciaunica, A., Demertzi, A., Fahrenfort, J., Faivre, N., Francken, J. C., Lamy, D.,  
Lenggenhager, B., Moutoussis, M., Nizzi, M.-C., Salomon, R., Soto, D., Stein, T., & Lubianiker, N.  
(2023). The Scientific Study of Consciousness Cannot and Should Not Be Morally Neutral.  
*Perspectives on Psychological Science*, 18(3), 535-543.
- Mink JW. The Basal Ganglia: Focused Selection and Inhibition of Competing Motor Programs. *Prog  
550 Neurobiol.* 1996;50(4):381-425.
- Mosher CP, Mamelak AN, Malekmohammadi M, Pouratian N, Rutishauser U. Distinct roles of dorsal  
and ventral subthalamic neurons in action selection and cancellation. *Neuron.* 2021;109(5):869-  
881.e6.
- Nieder, A., Wagener, L., & Rinnert, P. A neural correlate of sensory consciousness in a corvid bird.  
555 *Science* 2020, 369(6511), 1626-1629.
- Pelli, D. G. The VideoToolbox software for visual psychophysics: Transforming numbers into movies,  
*Spatial Vision* 1997;10:437-442.
- Pereira M, Megevand P, Tan MX, Chang W, Wang S, Rezai A, et al. Evidence accumulation relates to  
perceptual consciousness and monitoring. *Nat Commun.* 2021;12(1):3261.
- 560 Pereira M, Perrin D, Faivre N. A leaky evidence accumulation process for perceptual experience.  
*Trends Cogn Sci.* 2022;S1364661322000614.
- Quiroga RQ, Mukamel R, Isham EA, Malach R, Fried I. Human single-neuron responses at the

- threshold of conscious recognition. *Proc Natl Acad Sci*. 2008;105(9):3599-604.
- 565 Reber TP, Faber J, Niediek J, Boström J, Elger CE, Mormann F. Single-Neuron Correlates of  
Conscious Perception in the Human Medial Temporal Lobe. *Curr Biol*. 2017;27(19):2991-  
2998.e2.
- Rutishauser U, Schuman EM, Mamelak AN. Online detection and sorting of extracellularly recorded  
action potentials in human medial temporal lobe recordings, in vivo. *J Neurosci Methods*.  
2006;154(1-2):204-24.
- 570 Seth AK, Bayne T. Theories of consciousness. *Nat Rev Neurosci*. 2022;23(7):439-52.
- Shafto, J. P., & Pitts, M. A. Neural Signatures of Conscious Face Perception in an Inattentional  
Blindness Paradigm. *Journal of Neuroscience*, 2015, 35(31), 10940-10948.
- Shepherd, G. M. G., & Yamawaki, N. (2021). Untangling the cortico-thalamo-cortical loop : Cellular  
pieces of a knotty circuit puzzle. *Nature Reviews Neuroscience*, 22(7), 389-406.
- 575 Schiff ND. Central Thalamic Contributions to Arousal Regulation and Neurological Disorders of  
Consciousness. *Ann N Y Acad Sci*. 2008;1129(1):105-18.
- Schiff ND, Giacino JT, Kalmar K, Victor JD, Baker K, Gerber M, et al. Behavioural improvements with  
thalamic stimulation after severe traumatic brain injury. *Nature*. 2007;448(7153):600-3.
- Schmack, K., Bosc, M., Ott, T., Sturgill, J. F., & Kepecs, A.. Striatal dopamine mediates hallucination-  
580 like perception in mice. *Science*. 2021, 372(6537), eabf4740.
- Tauste Campo A, Vázquez Y, Álvarez M, Zainos A, Rossi-Pool R, Deco G, et al. Feed-forward  
information and zero-lag synchronization in the sensory thalamocortical circuit are modulated  
during stimulus perception. *Proc Natl Acad Sci*. 2019;116(15):7513-22.
- Team R. R: A language and environment for statistical computing. Published online 2020.
- 585 Tsuchiya, N., Wilke, M., Frässle, S., & Lamme, V. A. F. No-Report Paradigms : Extracting the True  
Neural Correlates of Consciousness. *Trends in Cognitive Sciences*, 2014, 19(12), 757-770.
- Vazquez, Y., Zainos, A., Alvarez, M., Salinas, E., & Romo, R. Neural coding and perceptual detection  
in the primate somatosensory thalamus. *Proceedings of the National Academy of Sciences*,  
2012, 109(37), 15006-15011.
- 590 Vazquez, Y., Salinas, E., & Romo, R. Transformation of the neural code for tactile detection from  
thalamus to cortex. *Proceedings of the National Academy of Sciences*, 2013, 110(28),  
E2635-E2644.
- Ward LM. The thalamus: gateway to the mind: Gateway to the mind. *Wiley Interdiscip Rev Cogn Sci*.  
2013;4(6):609-22.
- 595 Wickham H, Averick M, Bryan J, Chang W, McGowan LD, François R, Golemund G, Hayes A, Henry  
L, Hester J, Kuhn M. Welcome to the Tidyverse. *Journal of open source software*. 2019  
4(43):1686.
- Wyart, V., & Tallon-Baudry, C. Neural Dissociation between Visual Awareness and Spatial Attention.  
*The Journal of Neuroscience*, 2008, 28(10), 2667-2679.
